# Supplementary material
Source: publisher figshare collection journal article supplement (https://acs.figshare.com/ndownloader/files/3867532)
Supplement: Supplementary file 1 [file 3867532]

# Fluorescence Line Narrowing and $\Delta$ -FLN Spectra in the Presence of Excitation Energy Transfer between Weakly Coupled Chromophores

Valter Zazubovich

*Department of Physics, Concordia University, 7141 Sherbrooke Str. West, Montreal H4B 1R6, Quebec,  
Canada.*

**Supplemental Materials: FLN and  $\Delta$ -FLN spectra calculated for a dimer of pigments with non-identical but overlapping SDF.** Calculated FLN spectra for non-identical dimer (two 200  $\text{cm}^{-1}$  wide SDF peaked at 15,000 and 14,900  $\text{cm}^{-1}$ ;  $S_{\text{phonon}} = 0.8$ ) are presented in Figure S1. Frames A, B and C depict spectra obtained for  $V = 0$ ,  $V = 1 \text{ cm}^{-1}$  and  $V = 5 \text{ cm}^{-1}$ . Black, blue, red, green, magenta and orange curves correspond to excitation frequencies of 14750-15250  $\text{cm}^{-1}$ , with 100  $\text{cm}^{-1}$  step. The grey curves in the background represent full SDF (solid curves) and partial SDF of the two pigments. Dashed curves are partial SDF of the pigments which are the lower-energy ones in their dimers; dotted curves represent the partial SDF of the higher-energy pigments. In both figures below the magenta arrows indicate the location of the weak ZPL at 15150  $\text{cm}^{-1}$ , the orange arrows indicate the location of the weak ZPL at 15250  $\text{cm}^{-1}$ . As can be seen, at the red edge of the combined band of the two pigments the FLN spectra do not depend on the inter-pigment coupling. Indeed, almost no higher-energy pigments of the pair can be found at these frequencies.

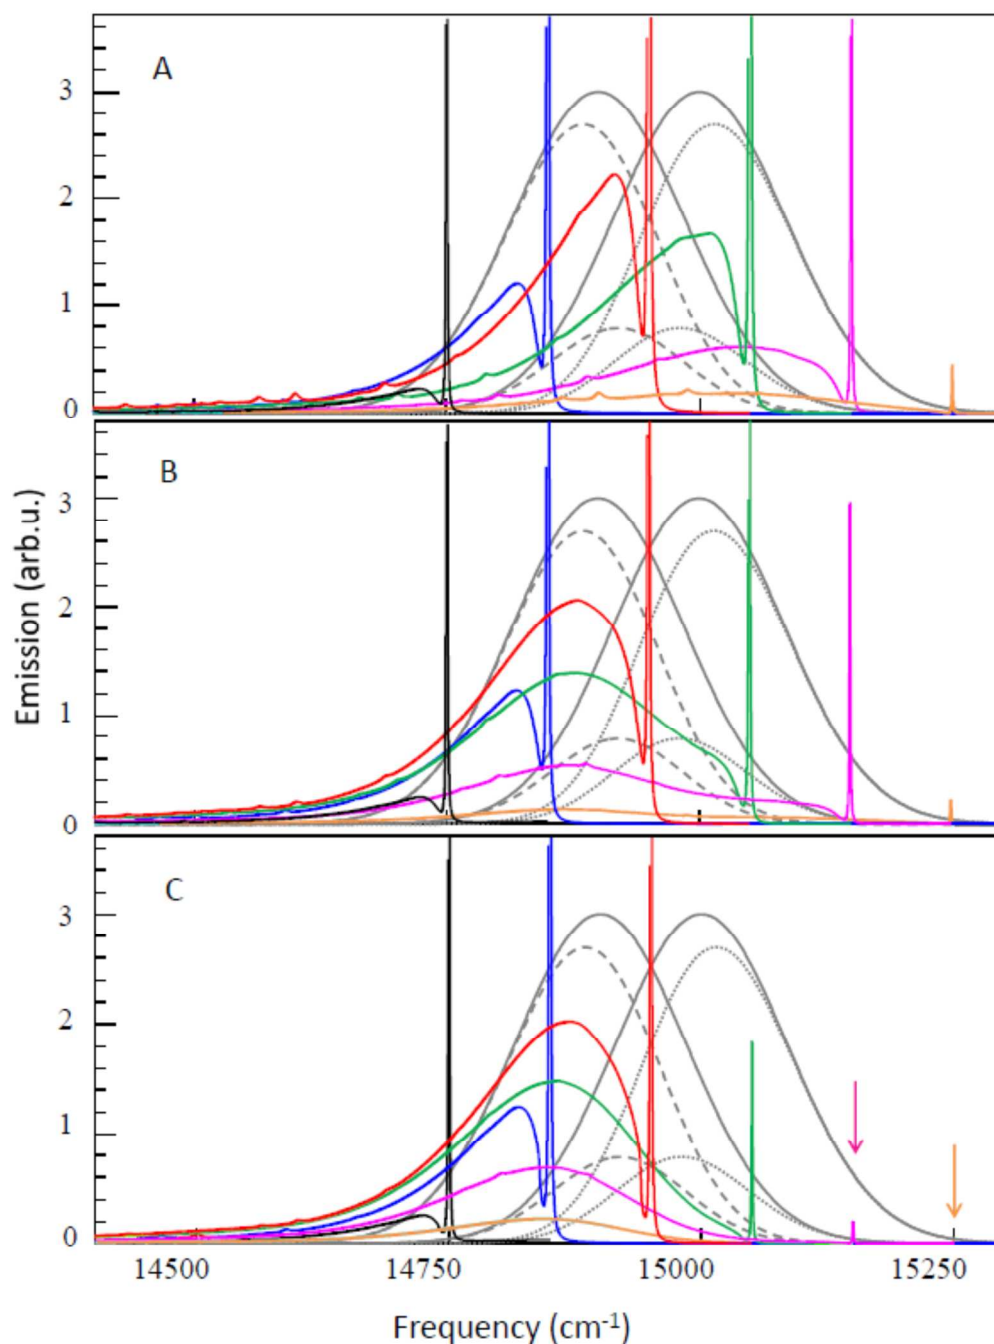

**Figure S1.** Frames A, B and C depict FLN spectra calculated for  $V = 0.0$ ,  $1.0$  and  $5.0 \text{ cm}^{-1}$ , respectively in the case of non-identical dimer. Black, blue, red, green, magenta and orange curves correspond to excitation frequencies of  $14750$ ,  $14850$ ,  $14950$ ,  $15050$ ,  $15150$  and  $15250 \text{ cm}^{-1}$ , respectively. Solid grey curves are full SDF of the two pigments. Dashed grey curves are partial SDF of the lower-energy pigments, while dotted grey curves are partial SDF of the higher-energy pigments. Arrows (see text) indicate the locations of the ZPL that are too weak.

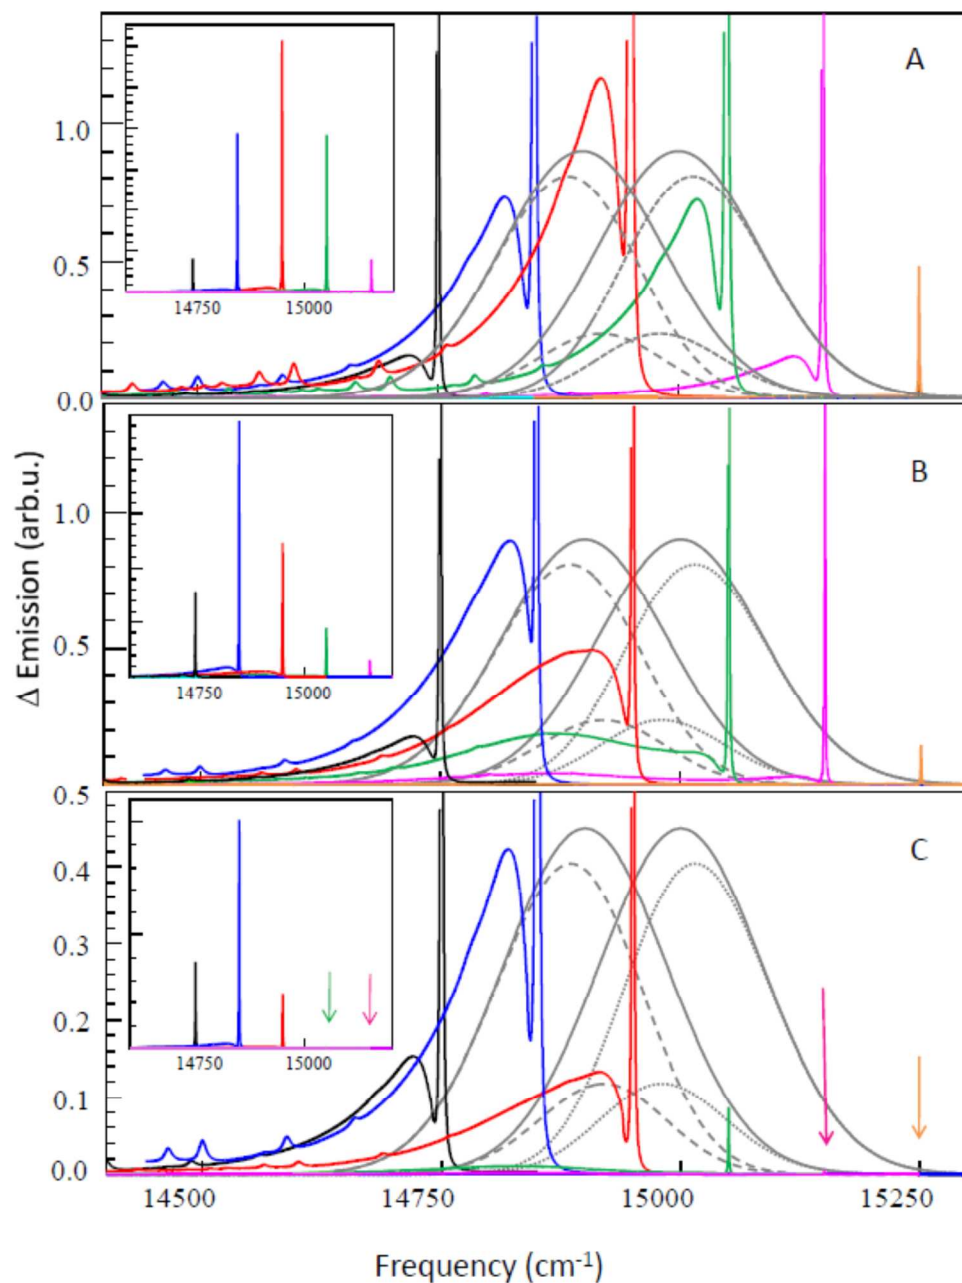

**Figure S2.** Frames A, B and C depict  $\Delta$ -FLN spectra calculated for  $V = 0.0, 1.0$  and  $5.0 \text{ cm}^{-1}$ , respectively. Black, blue, red, green, magenta and orange curves correspond to excitation frequencies of  $14750, 14850, 14950, 15050, 15150$  and  $15250 \text{ cm}^{-1}$ , respectively. Solid grey curves are full SDF of two pigments. Dashed grey curves are partial SDF of the lower-energy pigments, while dotted grey curves are partial SDF of the higher-energy pigments. Inserts depict the full  $\Delta$ -emission range and allow judging relative intensities of ZPL contributions. Color-coded arrows indicate the locations of the ZPL that are too weak.

Figure S2 depicts matching  $\Delta$ -FLN spectra, obtained for shallow, several percent deep, burns. The longest-wavelength spectra do not depend on inter-pigment coupling. For larger inter-pigment coupling  $V$  the shorter-wavelength  $\Delta$ -FLN spectra are suppressed, note that vertical scale in Frame C is different from that in Frames A and B. The inserts depict full vertical range, allowing the reader to assess relative intensities of the ZPL contributions to the  $\Delta$ -FLN spectra. As can be seen, and in agreement with the results for identical dimer and trimer, for high excitation frequencies increase of inter-pigment-coupling results not only in suppression of the ZPL contribution to the  $\Delta$ -FLN spectra, but also in suppression of the apparent non-resonant contribution. As discussed in the main text, this can be explained by the total number of lower-energy pigments to the red of the excitation frequency remaining practically unchanged (since the hole burning is non-photochemical).
